# Supplementary material
Source: publisher figshare collection journal article supplement (https://sage.figshare.com/ndownloader/files/21146091)
Supplement: Supplementary file 1 [file 21146091]

## Methodology File

### **Study 1a**

#### ***Phase 1: CI Generation***

R package rcic 0.3.0 (Dotsch, 2015) available at: <http://www.rondotsch.nl/rcicr/>

Base image retrieved from Brown-Iannuzzi et al., 2017

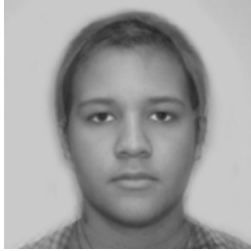

#### *400 trial image classification task instructions:*

“In this study, we are interested in people's perceptions of different groups. You will be presented with blurry face images and you will be asked to indicate which of them most closely looks like the average or prototypical police officer. At the end of the study you will complete a series of short questionnaires about yourself. “

“In this part of the experiment, we are interested in what you think police officers look like.

You will see two blurry faces side by side in a number of trials. Your task is simple: Just let us know which face you think looks more like a police officer. Please select "1" for the face on the left or "2" for the face on the right. We understand that this task may be difficult and seem repetitive at times. Just trust your gut and please keep your eyes on the screen.”

[Instructions accompanying each trial] “Which face looks more like a police officer?”

#### *Quantity and quality of contact with police questionnaire:*

1. How much contact have you had with police officers? (1=None, 7=A great deal)
2. How positive has your contact with police been? (1=Not at all positive, 7=Extremely positive)
3. How many police officers do you know? (1=None, 7=Know a lot)
4. How well do you know those police officers (1=Do not know those officers well, 7=Know those officers very well)

#### *Attitudes toward police questionnaire:*

1. To what extent do you feel police officers listen to community members and understand the issues that affect your community? (1=Not at all, 7=Extremely)
2. To what extent are police officers effective at fighting crime? (1=Not at all, 7=Extremely)
3. To what extent do you feel police officers listen to community members and understand the issues that affect your community? (1=Not at all, 7=Extremely)
4. To what extent do you feel police officers try to treat people fairly regardless of who they are? (1=Not at all, 7=Extremely)
5. To what extent do you feel police officers can be relied on to be there when you need them? (1=Not at all, 7=Extremely)

6. To what extent do you trust police officers to make decisions that are good for everyone in your community? (1=Not at all, 7=Extremely)

*Feeling Thermometer:*

100 Extremely Positive  
90 Very Positive  
80 Quite Positive  
70 Fairly Positive  
60 Slightly Positive  
50 Neither Positive nor Negative  
40 Slightly Negative  
30 Fairly Negative  
20 Quite Negative  
10 Very Negative  
0 Extremely Negative

## ***Phase 2: CI Evaluation***

*Face rating instructions:*

“Thank You for participating in today's experiment!

In this study, we are interested in people's perceptions of different groups. You will be presented with blurry face images and you will be asked to rate those images on a variety of traits.

Although these faces may seem similar, they are not identical. There are subtle differences. Please judge each face independent of the previous. Past research indicates that even in these blurry faces people are quite accurate in identifying characteristics and qualities about the person.

Please click continue.”

*Face rating images (presented in random order; full size available upon request):*

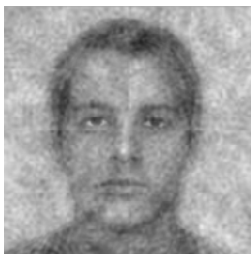

Black Group-Level CI

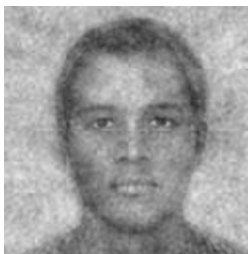

White Group-Level CI

*Face rating dimensions:*

“Please rate the person picture above on the following dimensions:” (presented in random order)

How disgusted does this person appear? (1=Not at all, 9=Extremely)  
How fearful does this person appear? (1=Not at all, 9=Extremely)  
How sad does this person appear? (1=Not at all, 9=Extremely)  
How angry does this person appear? (1=Not at all, 9=Extremely)

How aggressive does this person appear? (1=Not at all, 9=Extremely)  
How trustworthy does this person appear? (1=Not at all, 9=Extremely)  
How happy does this person appear? (1=Not at all, 9=Extremely)  
How agreeable does this person appear? (1=Not at all, 9=Extremely)  
How authoritative does this person appear? (1=Not at all, 9=Extremely)  
How prejudiced does this person appear? (1=Not at all, 9=Extremely)  
How hostile does this person appear? (1=Not at all, 9=Extremely)  
How caring does this person appear? (1=Not at all, 9=Extremely)  
How empathetic does this person appear? (1=Not at all, 9=Extremely)  
How fair does this person appear? (1=Not at all, 9=Extremely)  
How biased does this person appear? (1=Not at all, 9=Extremely)  
How compassionate does this person appear? (1=Not at all, 9=Extremely)  
How friendly does this person appear? (1=Not at all, 9=Extremely)  
How approachable does this person appear? (1=Not at all, 9=Extremely)  
How lazy does this person appear? (1=Not at all, 9=Extremely)  
How warm does this person appear? (1=Not at all, 9=Extremely)  
How competent does this person appear? (1=Not at all, 9=Extremely)  
How dominant does this person appear? (1=Not at all, 9=Extremely)  
How powerful does this person appear? (1=Not at all, 9=Extremely)  
How worthy of respect does this person appear? (1=Not at all, 9=Extremely)  
How heroic does this person appear? (1=Not at all, 9=Extremely)  
How attractive does this person appear? (1=Not at all, 9=Extremely)  
How intelligent does this person appear? (1=Not at all, 9=Extremely)  
How hardworking does this person appear? (1=Not at all, 9=Extremely)  
How morally sound does this person appear? (1=Not at all, 9=Extremely)

## **Study 1b**

### ***Phase 1: CI Generation***

R package rcic 0.3.0 (Dotsch, 2015) available at: <http://www.rondotsch.nl/rcicr/>

### ***Phase 2: CI Evaluation***

*Face rating instructions:*

“Thank You for participating in today's experiment!

In this study, we are interested in people's perceptions of different groups. You will be presented with blurry face images and you will be asked to rate those images on a variety of traits.

Although these faces may seem similar, they are not identical. There are subtle differences. Please judge each face independent of the previous. Past research indicates that even in these blurry faces people are quite accurate in identifying characteristics and qualities about the person.

Please click continue.”

*Sample face rating images (presented in random order; full size available upon request):*

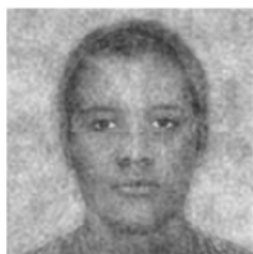

Ps1

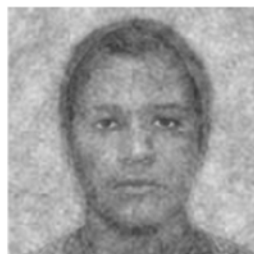

Ps2

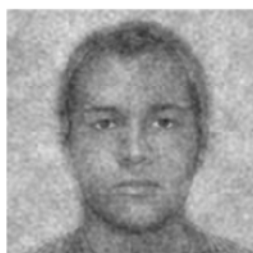

Ps3

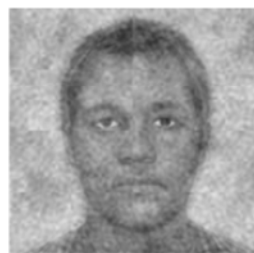

Ps4

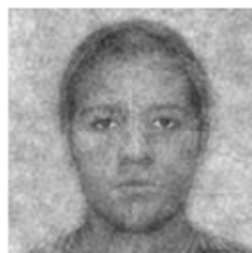

Ps5

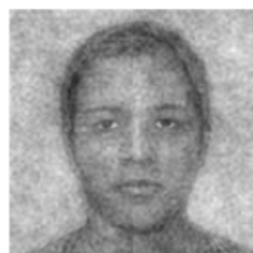

Ps6

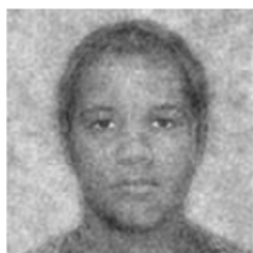

Ps7

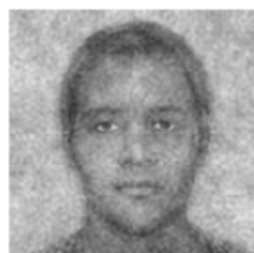

Ps8

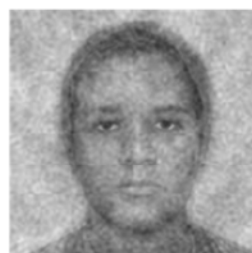

Ps9

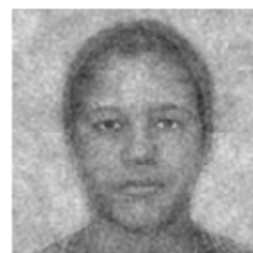

Ps10

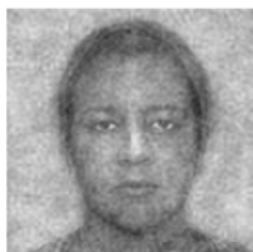

Ps11

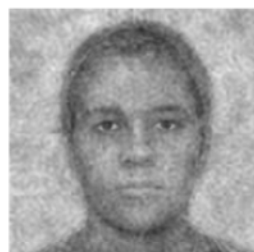

Ps12

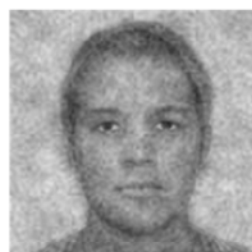

Ps14

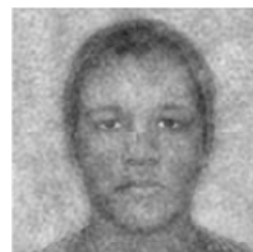

Ps15

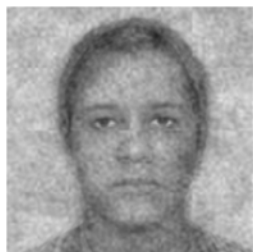

Ps16

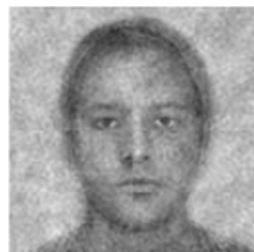

Ps17

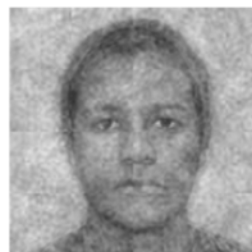

Ps18

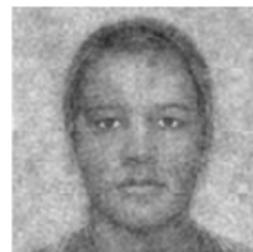

Ps19

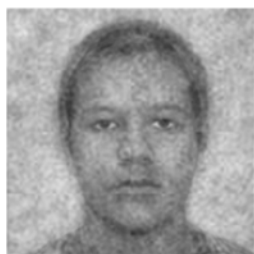

Ps20

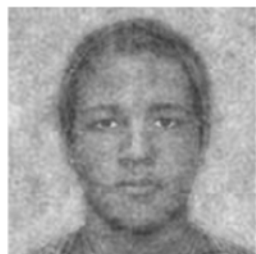

Ps21

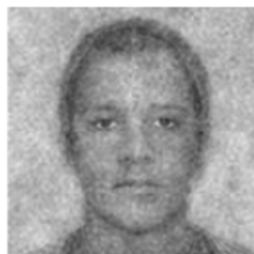

Ps22

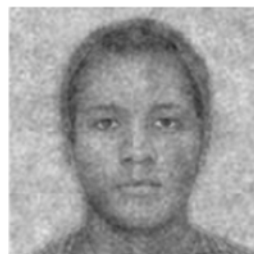

Ps23

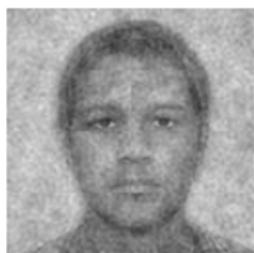

Ps24

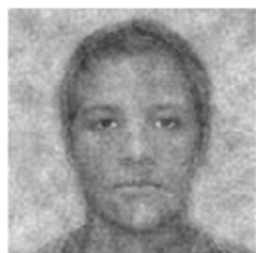

Ps25

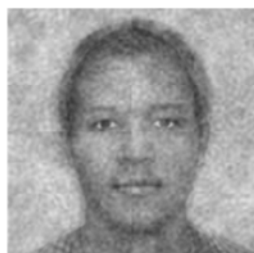

Ps26

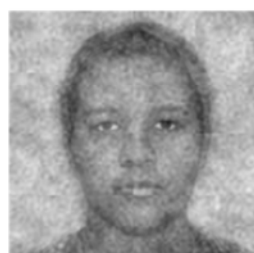

Ps27

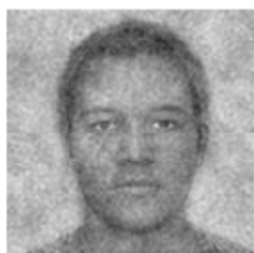

Ps28

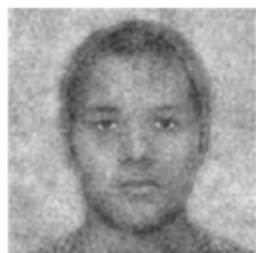

Ps29

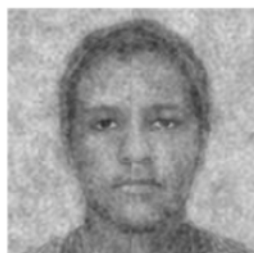

Ps30

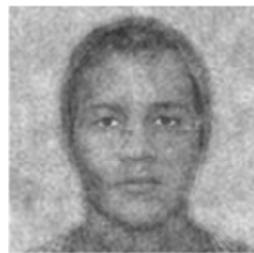

Ps31

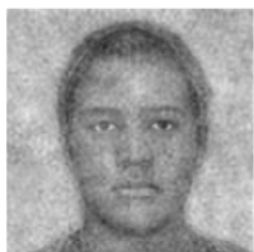

Ps32

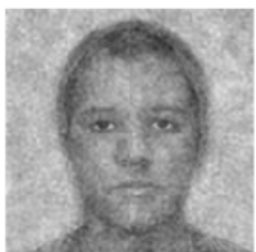

Ps33

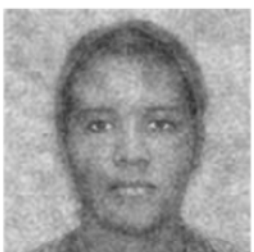

Ps34

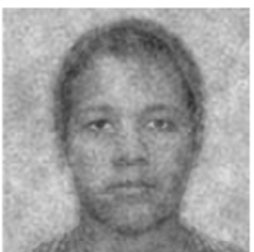

Ps35

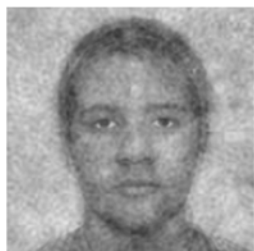

Ps36

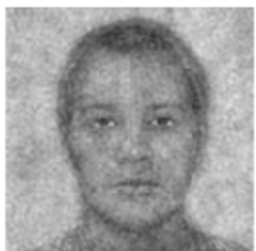

Ps37

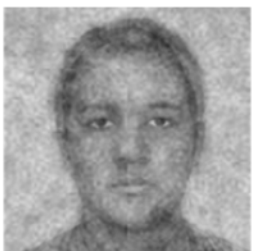

Ps38

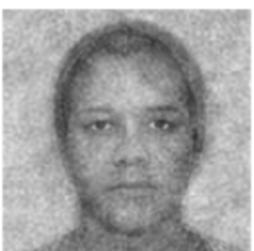

Ps40

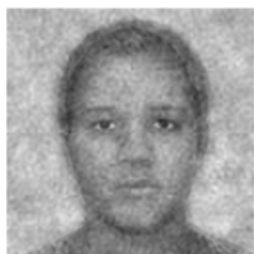

Ps42

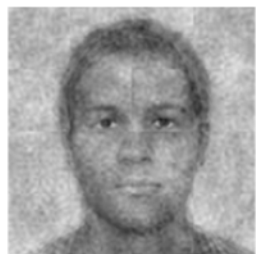

Ps43

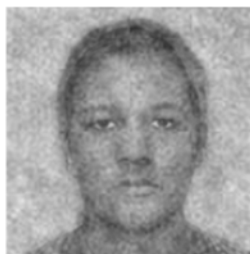

Ps44

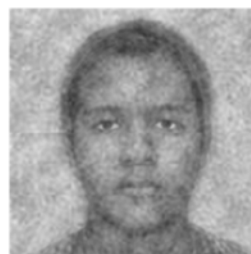

Ps45

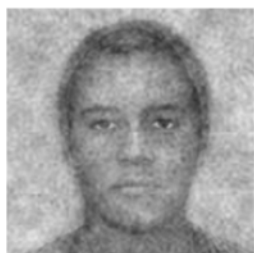

Ps46

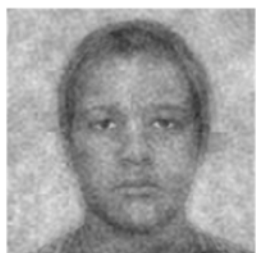

Ps47

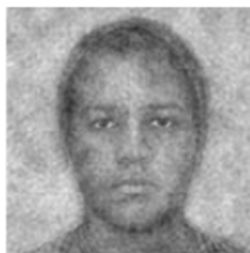

Ps48

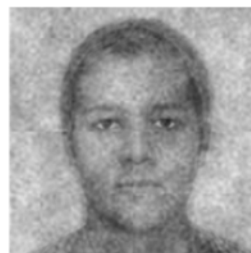

Ps49

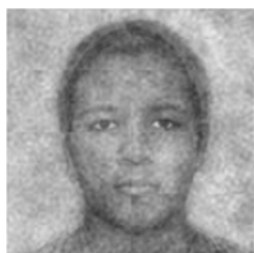

Ps50

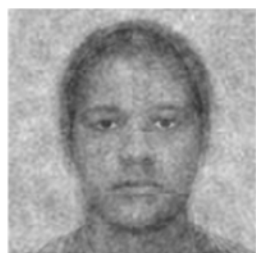

Ps51

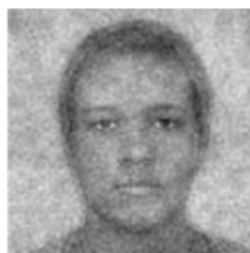

Ps52

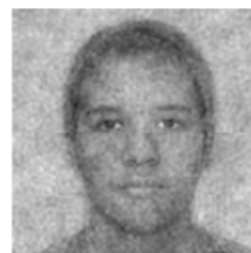

Ps53

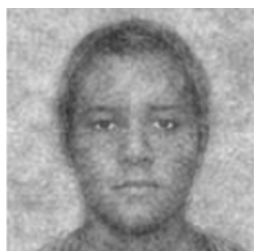

Ps54

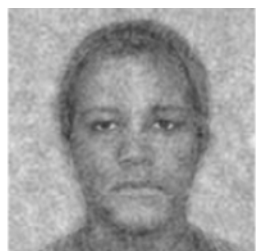

Ps55

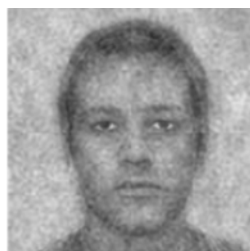

Ps56

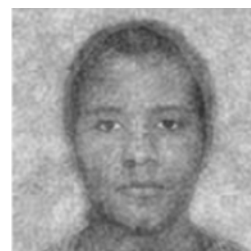

Ps57

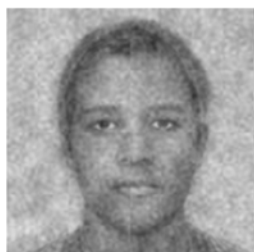

Ps58

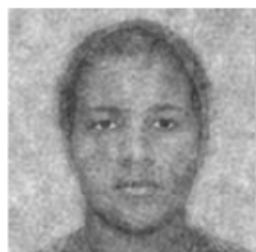

Ps59

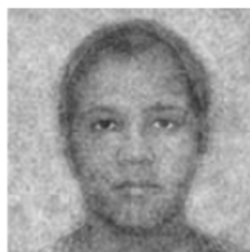

Ps60

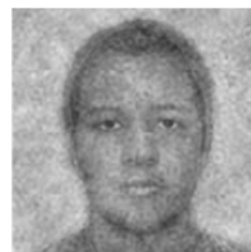

Ps61

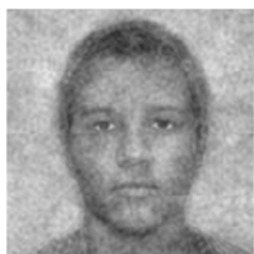

Ps62

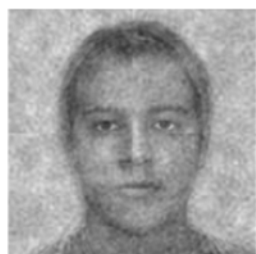

Ps63

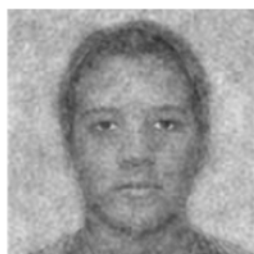

Ps64

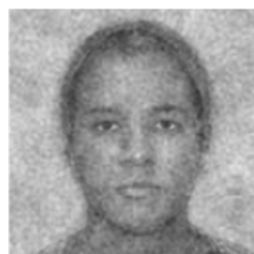

Ps65

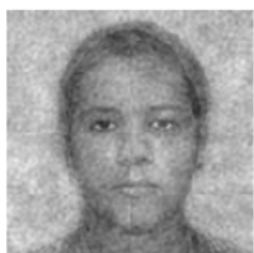

Ps66

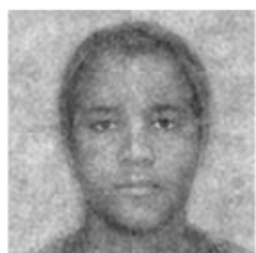

Ps67

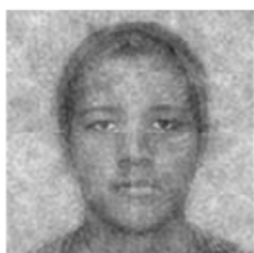

Ps68

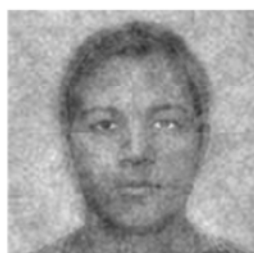

Ps69

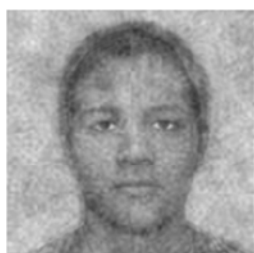

Ps70

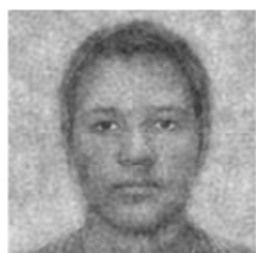

Ps71

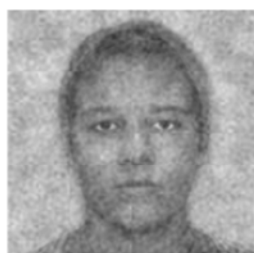

Ps72

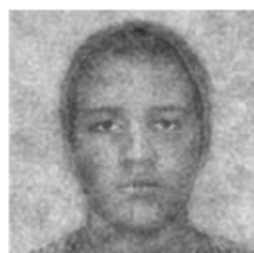

Ps73

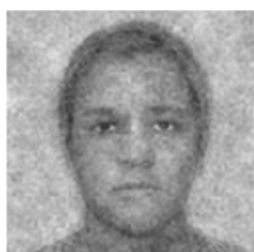

Ps74

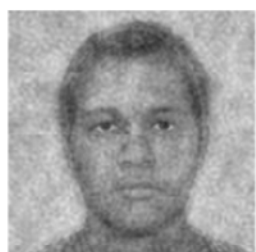

Ps75

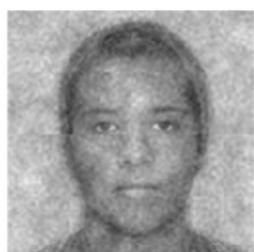

Ps76

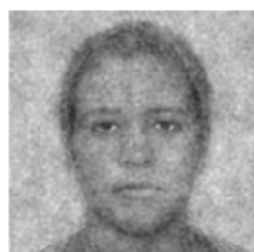

Ps77

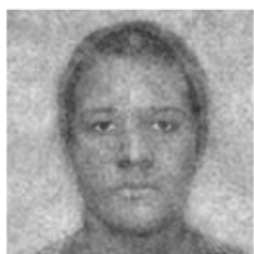

Ps78

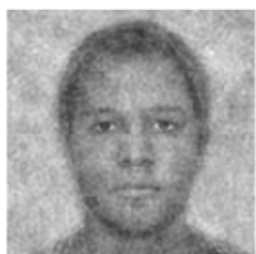

Ps79

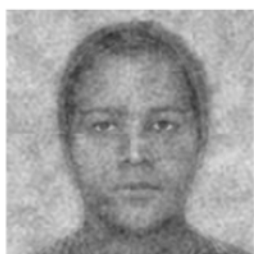

Ps80

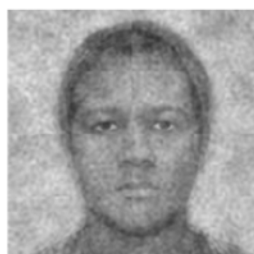

Ps81

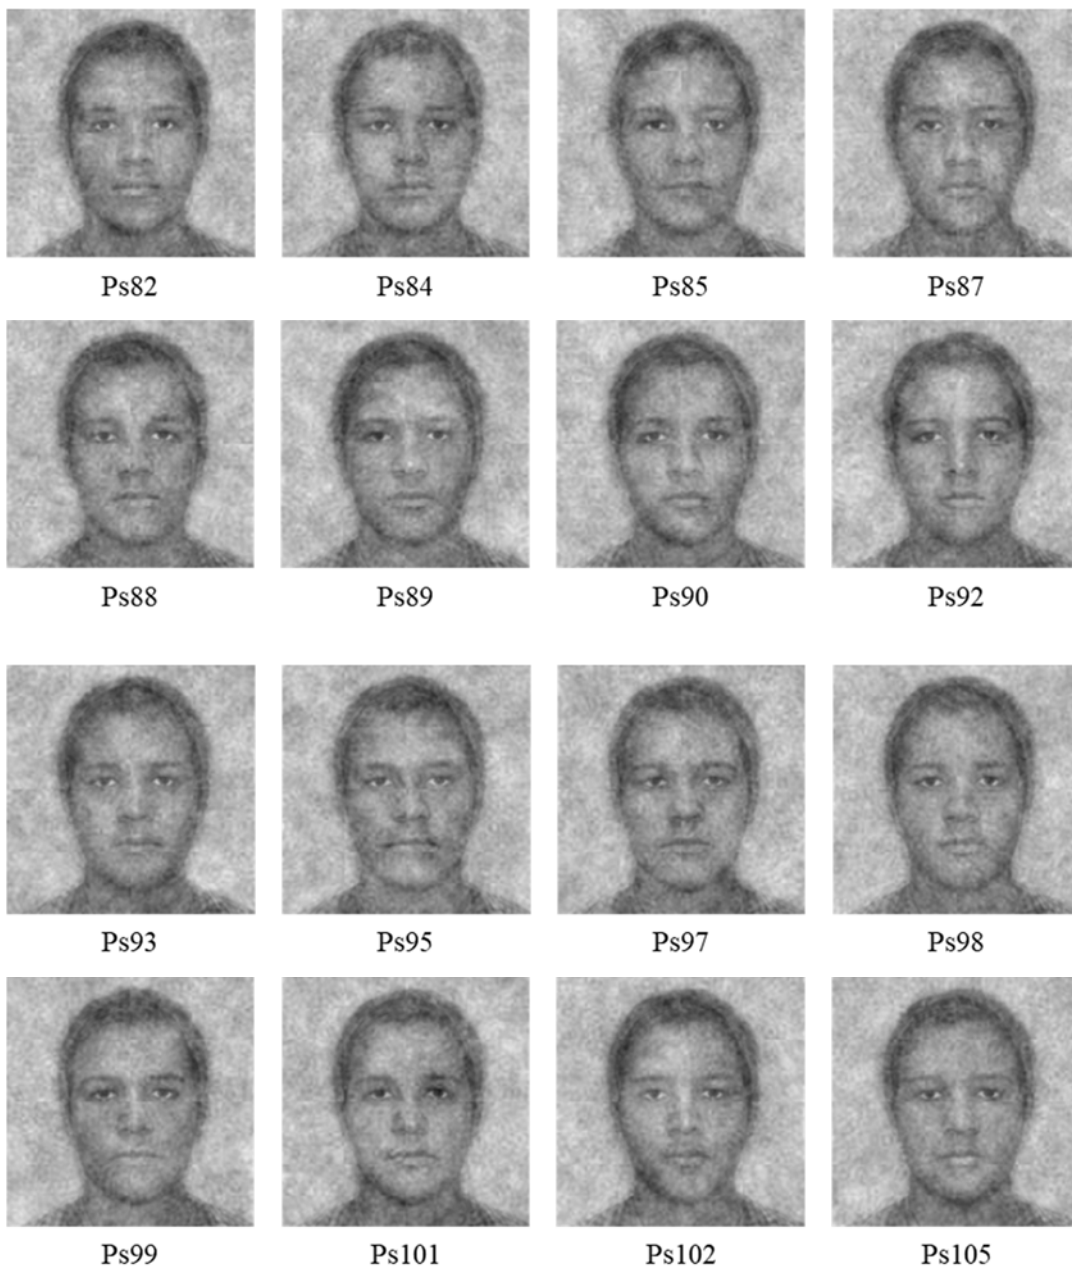

*Face stimuli key to race of phase 1 participant:*

| Ps | race (3=Black, 5= White)<br>*non-White, Black, or<br>monoracial Ps excluded |
|----|-----------------------------------------------------------------------------|
| 1  | 5                                                                           |
| 2  | 5                                                                           |
| 3  | 3                                                                           |
| 4  | 5                                                                           |
| 5  | 3                                                                           |
| 6  | 5                                                                           |



|    |   |
|----|---|
| 7  | 5 |
| 8  | 5 |
| 9  | 3 |
| 10 | 3 |
| 11 | 3 |
| 12 | 5 |
| 14 | 5 |
| 15 | 5 |
| 16 | 3 |
| 17 | 5 |
| 18 | 5 |
| 19 | 5 |
| 20 | 3 |
| 21 | 5 |
| 22 | 3 |
| 23 | 5 |
| 24 | 5 |
| 25 | 3 |
| 26 | 5 |
| 27 | 5 |
| 28 | 5 |
| 29 | 3 |
| 30 | 5 |
| 31 | 5 |
| 32 | 5 |
| 33 | 3 |
| 34 | 5 |
| 35 | 5 |
| 36 | 3 |
| 37 | 3 |
| 38 | 3 |
| 40 | 5 |
| 42 | 5 |
| 43 | 5 |
| 44 | 5 |
| 45 | 3 |
| 46 | 5 |
| 47 | 3 |
| 48 | 5 |
| 49 | 5 |
| 50 | 5 |

|    |   |
|----|---|
| 51 | 3 |
| 52 | 3 |
| 53 | 5 |
| 54 | 5 |
| 55 | 5 |
| 56 | 3 |
| 57 | 3 |
| 58 | 5 |
| 59 | 3 |
| 60 | 5 |
| 61 | 3 |
| 62 | 3 |
| 63 | 3 |
| 64 | 5 |
| 65 | 5 |
| 66 | 3 |
| 67 | 3 |
| 68 | 5 |
| 69 | 3 |
| 70 | 3 |
| 71 | 5 |
| 72 | 3 |
| 73 | 5 |
| 74 | 5 |
| 75 | 5 |
| 76 | 5 |
| 77 | 5 |
| 78 | 5 |
| 79 | 5 |
| 80 | 3 |
| 81 | 5 |
| 82 | 5 |
| 84 | 5 |
| 85 | 3 |
| 87 | 5 |
| 88 | 3 |
| 89 | 3 |
| 90 | 3 |
| 92 | 3 |
| 93 | 3 |
| 95 | 3 |

|     |   |
|-----|---|
| 97  | 3 |
| 98  | 3 |
| 99  | 3 |
| 101 | 3 |
| 102 | 3 |
| 105 | 3 |

*Face rating dimensions:*

“Please rate the person picture above on the following dimensions:”

*Traits: (presented in random order)*

How friendly does this person appear? (1=Not at all, 9=Extremely)

How warm does this person appear? (1=Not at all, 9=Extremely)

How empathetic does this person appear? (1=Not at all, 9=Extremely)

How fearful does this person appear? (1=Not at all, 9=Extremely)

How hostile does this person appear? (1=Not at all, 9=Extremely)

How dominant does this person appear? (1=Not at all, 9=Extremely)

How dominant does this person appear? (1=Not at all, 9=Extremely)

How authoritative does this person appear? (1=Not at all, 9=Extremely)

How powerful does this person appear? (1=Not at all, 9=Extremely)

## Study 2

*Face rating instructions:*

“Thank You for participating in today's experiment!

In this study, we are interested in people's perceptions of different groups. You will be presented with blurry face images and you will be asked to rate those images on a variety of traits.

Although these faces may seem similar, they are not identical. There are subtle differences. Please judge each face independent of the previous. Past research indicates that even in these blurry faces people are quite accurate in identifying characteristics and qualities about the person.

Please click continue.”

*Face rating images (presented in random order):*

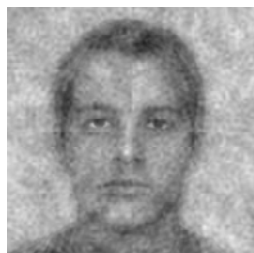

Black Group-Level CI

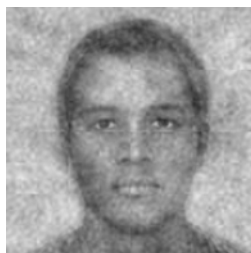

White Group-Level CI

*Face rating dimensions:*

“Please rate the person picture above on the following dimensions:”

*Traits: (presented in random order)*

How friendly does this person appear? (1=Not at all, 9=Extremely)  
How warm does this person appear? (1=Not at all, 9=Extremely)  
How empathetic does this person appear? (1=Not at all, 9=Extremely)  
How fearful does this person appear? (1=Not at all, 9=Extremely)  
How hostile does this person appear? (1=Not at all, 9=Extremely)  
How dominant does this person appear? (1=Not at all, 9=Extremely)  
How dominant does this person appear? (1=Not at all, 9=Extremely)  
How authoritative does this person appear? (1=Not at all, 9=Extremely)  
How powerful does this person appear? (1=Not at all, 9=Extremely)

*Group membership: (presented in order shown below)*

How Eurocentric (White) does this person appear? (1=Not at all, 9=Extremely)  
How Afrocentric (Black) does this person appear? (1=Not at all, 9=Extremely)  
How feminine does this person appear? (1=Not at all, 9=Extremely)  
How masculine does this person appear? (1=Not at all, 9=Extremely)

### Study 3

*Face rating instructions:*

“In this study, we are interested in people's perceptions of different individuals. You will be presented with one blurry face and a scenario. The face you see will be randomly selected. Pay close attention to cues in the face, imagine yourself in the scenario, and then respond to the questions.

Please click continue.”

*Face rating images (between subjects):*

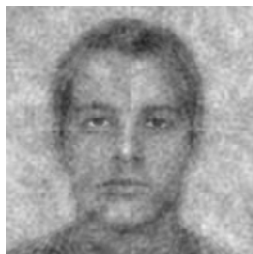

Black Group-Level CI

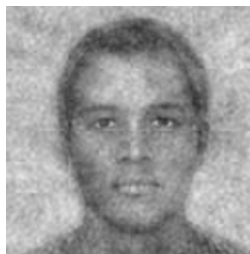

White Group-Level CI

*Imagined scenario instructions:*

“Look carefully at the face above and imagine the following scenario:

You're walking home alone at night when the person pictured above says to stop walking. They are a police officer. They are armed. They begin to approach you. To your knowledge you are doing nothing wrong and are breaking no laws.

*Feelings of anxiety measure: (presented in random order)*

How tense would you feel? (1=Not at all, 9=Extremely)

How frightened would you feel? (1=Not at all, 9=Extremely)  
How anxious would you feel? (1=Not at all, 9=Extremely)  
How scared would you feel? (1=Not at all, 9=Extremely)  
How worried would you feel? (1=Not at all, 9=Extremely)  
How safe would you feel? (1=Not at all, 9=Extremely)  
How at ease would you feel? (1=Not at all, 9=Extremely)  
How relaxed would you feel? (1=Not at all, 9=Extremely)  
How protected would you feel? (1=Not at all, 9=Extremely)  
How comfortable would you feel? (1=Not at all, 9=Extremely)

*Fight-and-flight behavioral intentions measure: (presented in random order)*

“Again look carefully at the face above and continue to imagine the scenario.”

To what extent would you be preparing to physically defend yourself, in case it became necessary? (1=Not at all, 9=Extremely)

To what extent would you be preparing to run away, in case it became necessary? (1=Not at all, 9=Extremely)

*Quantity and quality of contact with police questionnaire:*

5. How much contact have you had with police officers? (1=None, 7=A great deal)
6. How positive has your contact with police been? (1=Not at all positive, 7=Extremely positive)
7. How many police officers do you know? (1=None, 7=Know a lot)
8. How well do you know those police officers (1=Do not know those officers well, 7=Know those officers very well)

*Attitudes toward police questionnaire:*

7. To what extent do you feel police officers listen to community members and understand the issues that affect your community? (1=Not at all, 7=Extremely)
8. To what extent are police officers effective at fighting crime? (1=Not at all, 7=Extremely)
9. To what extent do you feel police officers listen to community members and understand the issues that affect your community? (1=Not at all, 7=Extremely)
10. To what extent do you feel police officers try to treat people fairly regardless of who they are? (1=Not at all, 7=Extremely)
11. To what extent do you feel police officers can be relied on to be there when you need them? (1=Not at all, 7=Extremely)
12. To what extent do you trust police officers to make decisions that are good for everyone in your community? (1=Not at all, 7=Extremely)

## **Study 4**

*Face rating instructions:*

“In this study, we are interested in people's perceptions of different groups. You will be presented with 2 images of blurry faces and you will be asked to rate those images on a variety of traits.

Although these faces may seem similar, they are not identical. There are subtle differences. Please judge each face independent of the previous. Past research indicates that even in these blurry faces people are quite accurate in identifying characteristics and qualities about the person.

Please click continue.”

*Face rating images (between subjects):*

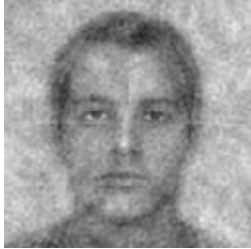

Black Group-Level CI

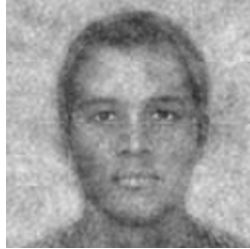

White Group-Level CI

*Face rating dimensions:*

“Please rate the person picture above on the following dimensions:”

*Traits: (presented in random order)*

- How friendly does this person appear? (1=Not at all, 9=Extremely)
- How warm does this person appear? (1=Not at all, 9=Extremely)
- How empathetic does this person appear? (1=Not at all, 9=Extremely)
- How fearful does this person appear? (1=Not at all, 9=Extremely)
- How hostile does this person appear? (1=Not at all, 9=Extremely)
- How dominant does this person appear? (1=Not at all, 9=Extremely)
- How dominant does this person appear? (1=Not at all, 9=Extremely)
- How authoritative does this person appear? (1=Not at all, 9=Extremely)
- How powerful does this person appear? (1=Not at all, 9=Extremely)

*Imagined scenario instructions:*

“Look carefully at the face above and imagine the following scenario:

You're walking home alone at night when the person pictured above says to stop walking. They are a police officer. They are armed. They begin to approach you. To your knowledge you are doing nothing wrong and are breaking no laws.

*Feelings of anxiety measure: (presented in random order)*

- How tense would you feel? (1=Not at all, 9=Extremely)
- How frightened would feel? (1=Not at all, 9=Extremely)
- How anxious would you feel? (1=Not at all, 9=Extremely)
- How scared would you feel? (1=Not at all, 9=Extremely)
- How worried would you feel? (1=Not at all, 9=Extremely)
- How safe would you feel? (1=Not at all, 9=Extremely)
- How at ease would you feel? (1=Not at all, 9=Extremely)
- How relaxed would you feel? (1=Not at all, 9=Extremely)
- How protected would you feel? (1=Not at all, 9=Extremely)
- How comfortable would you feel? (1=Not at all, 9=Extremely)

*Fight-and-flight behavioral intentions measure: (presented in random order)*

“Again look carefully at the face above and again imagine the scenario.

You're walking home alone at night when the person pictured above says to stop walking. They are a police officer. They are armed. They begin to approach you. To your knowledge you are doing nothing wrong and are breaking no laws.”

To what extent would you be preparing to physically defend yourself, in case it became necessary? (1=Not at all, 9=Extremely)

To what extent would you be preparing to run away, in case it became necessary? (1=Not at all, 9=Extremely)

*Quantity and quality of contact with police questionnaire:*

9. How much contact have you had with police officers? (1=None, 7=A great deal)
10. How positive has your contact with police been? (1=Not at all positive, 7=Extremely positive)
11. How many police officers do you know? (1=None, 7=Know a lot)
12. How well do you know those police officers (1=Do not know those officers well, 7=Know those officers very well)

*Attitudes toward police questionnaire:*

13. To what extent do you feel police officers listen to community members and understand the issues that affect your community? (1=Not at all, 7=Extremely)
14. To what extent are police officers effective at fighting crime? (1=Not at all, 7=Extremely)
15. To what extent do you feel police officers listen to community members and understand the issues that affect your community? (1=Not at all, 7=Extremely)
16. To what extent do you feel police officers try to treat people fairly regardless of who they are? (1=Not at all, 7=Extremely)
17. To what extent do you feel police officers can be relied on to be there when you need them? (1=Not at all, 7=Extremely)
18. To what extent do you trust police officers to make decisions that are good for everyone in your community? (1=Not at all, 7=Extremely)
